# Supplementary material
Source: PubMed Central journal article supplement (PMC6182115)
Supplement: supp_6.3.E330_2018-0013-1-at.pdf [file supp_6.3.E330_2018-0013-1-at.pdf]

## Appendix 1 (as supplied by the authors): Supplementary tables

Supplementary Table A1. Description of OHIP codes used in the current study.

| OHIP Billing Code                            | OHIP Billing Code Description                                |
|----------------------------------------------|--------------------------------------------------------------|
| Colonoscopy and related codes                |                                                              |
| Z555A                                        | INTESTINES-ENDOSCOPY-COLONOSCOPY INTO DESCENDING COLON       |
| E740A                                        | INTESTINE ENDO SIGMOID TO SPLENIC FLEXURE ADD                |
| E741A                                        | INTESTINE END SIGMOID TO HEPATIC FLEXURE ADD                 |
| E747A                                        | INTESTINE-ENDOSCOPY-SIGMOID.TO CAECUM ADD TO Z512/Z555       |
| E705A                                        | DIGEST.SYST.INTEST.ENDOSC.INTO TERMINAL ILEUM,ADD.           |
| E749A                                        | DIGEST SYST.-WHEN Z512,555,580 PERFORMED OUT HOSP....ADD     |
| Z570A                                        | INTESTINES-EXCISION-FULGURATION OF POLYPS THRO.COLONOSCOPE   |
| Z571A                                        | INTESTINES-EXC.-POLYPS THRO. COLONOSCOPE                     |
| E685A                                        | INTESTINES,ENDOSCOPY TOTAL EXCISION >3CM SESSILE POLYPS      |
| Gastroscopy and flexible sigmoidoscopy codes |                                                              |
| Z399A                                        | OESOPHAGUS-OESOPHAGO/GASTRO. WITH/OUT DUODENOSCOPY           |
| Z515A                                        | DIGEST.SYST.OESOPHAGOSCOPY WITH/OUT BIOPSY(S)                |
| Z523A                                        | OESOPHAGUS-DILATION OF OESOPHAGUS-GUIDED(STRING,WIRE)        |
| Z525A                                        | OESOPHAGUS-DILATION-OESOPH.-PNEUMATIC                        |
| Z527A                                        | STOMACH-ENDOSCOPY-GASTROSCOPY                                |
| Z528A                                        | STOMACH-ENDOSCOPY-GASTROSCOPY-SUBSEQ.                        |
| Z532A                                        | PERCUT ENDOSCOPC GASTROSTMY-REV Z CD & INCR FEE TO 1/2 S118  |
| Z547A                                        | STOMACH-ENDOSCOPY GASTROSCOPY WITH REMOVAL FOREIGN BODY      |
| Z580A                                        | INTESTINE-ENDOSCOPY-USING 60C.M. FLEXIBLE ENDOSCOPE.         |
| Colectomy codes                              |                                                              |
| S166A                                        | INTESTINE-EXC.-SML+LGE INTESTINE-TERM.ILEUM-CAECUM ASC.COLON |
| S168A                                        | INTESTINE-EXC.-ILEOSTOMY.SUBTOTAL COLECTOMY                  |
| S169A                                        | INTESTINE-EXC-TOTAL COLECTOMY W/ILEO-RECTAL ANASTOMOSIS.     |
| S170A                                        | INTESTINE-EXC.-ILEOSTOMY+TTLCOLECTOMY+ABDOM-PERIN.RESECTION  |
| S172A                                        | INTESTINE-EXC.-TOTAL COLECTOMY WITH LOOP ILEOSTOMY.          |

|       |                                                              |
|-------|--------------------------------------------------------------|
| S214A | RECTUM-EXC.-PROCTECTOMY-ABDOMINO-PERINEAL<br>RESEC/PULL THRU |
| S215A | RECTUM-EXC.PROCTECTOMY-2 SURG. TEAM ABDOMINAL<br>SURGEON     |
| S216A | RECTUM-EXC.-PROCTECTOMY-2 SURG. TEAM PERINEAL<br>SURGEON     |

Supplementary Table A2. OHIP billing codes used in analysis to identify anaesthesia assistance. This list was empirically derived from Ontario health administrative data by identifying endoscopy-related and anesthesia codes with “C” suffix billed +/- 1 day of a colonoscopy from 1993-2005.\*

| OHIP Billing Code | OHIP Billing Code Description                                                                                       |
|-------------------|---------------------------------------------------------------------------------------------------------------------|
| E003C             | ASST./ANAE. ATTEND. - MONITORING/CARE                                                                               |
| E747C             | ENDOSC SIGMOID TO CAECUM, ADD TO Z512/Z555                                                                          |
| S119C             | PERCUTANEOUS ENDOSCOPIC GASTROSTOMY                                                                                 |
| S236C             | ESOPHAGUS - ENDOSCOPIC ULTRASOUND USING LINEAR OR RADIAL ECHO-ENDOSCOPE - EXCLUDING BILIARY OR PANCREATIC EXAM.     |
| S237C             | ESOPHAGUS - ENDOSCOPIC ULTRASOUND USING LINEAR OR RADIAL ECHO-ENDOSCOPE - INCLUDING BILIARY AND/OR PANCREATIC EXAM. |
| Z399C             | OESOPHAGOSCOPY-GASTROCOPY W/OUT DUDENOSCOPY - ELECTIVE                                                              |
| Z400C             | OESOPHAGUS - FOR ACTIVE BLEEDING                                                                                    |
| Z512C             | INTESTINES - ENDOSCOPY ILEOSTOMY OR COLOSTOMY                                                                       |
| Z514C             | INTESTINES - ENDOSCOPY ILEOSTOMY OR COLOSTOMY WITH BIOPSY                                                           |
| Z515C             | OESOPHAGOSCOPY WITH/OUT BIOPSY                                                                                      |
| Z527C             | STOMACH - ENDOSCOPY - GASTROSCOPY (W/OUT BIOPSY/PHOTO)                                                              |
| Z528C             | SUBSEQ (WITHIN 3 MONTHS FOLLOWING PREV GASTROSCOPY                                                                  |
| Z535C             | RECTUM - SIGMOIDOSCOPY W/OUT ANOSCOPY (NOT WITH Z555/Z580)                                                          |
| Z536C             | RECTUM - SIGMOIDOSCOPY W/OUT ANOSCOPY - W/BIOPSY                                                                    |
| Z544C             | ANUS - INC. BIOPSY                                                                                                  |
| Z547C             | STOMACH - GASTROSCOPY WITH REMOVAL OF FOREIGN BODY                                                                  |
| Z551C             | LIVER - INC - BIOPSY, NEEDLE                                                                                        |
| Z555C             | ENDOSCOPY - SIGMOID/DESCENDING COLON                                                                                |
| Z558C             | BILIARY TRACT - ENDO MANIP &/OR REM DUCT STONES W/OUT SPHINCTEROTOMY                                                |
| Z560C             | INTESTINES - ENDOSCOPY - DUODENOSCOPY (NOT WITH Z399/Z400)                                                          |
| Z561C             | INTESTINES - DUODENOSCOPY - CANN. PANCR. DUCT                                                                       |
| Z567C             | SUBSEQ PROC (WITHIN 3 MON. FOLL PREV ENDOSCOPIC PROC)                                                               |
| Z568C             | SUBSEQ PROC SAME PHYS (WITHIN 3 MON. PREV ENDOSCOPIC PROC)                                                          |
| Z570C             | FULG POLYP THROUGH COLONOSCOPE                                                                                      |
| Z571C             | EXC POLYP, THROUGH COLONOSCOPE                                                                                      |
| Z576C             | INTRO - INJECTIONS ANAL FISSURE                                                                                     |

|       |                                                               |
|-------|---------------------------------------------------------------|
| Z580C | ENDOSCOPY (USING 60CM. FLEX SCOPE)                            |
| Z592C | RECTUM - SIGMOIDOSCOPY - DECOMPRESSION/VOLVULUS               |
| Z749C | INTEST - ENDOSCOPY - SUBSEQ PROC (WITHIN 3 MONTHS)            |
| Z753C | RECTUM - POLYPS/TUMOURS ELECTROCOAG - UNDER 2 CMS             |
| Z754C | RECTUM - POLYPS/TUMOURS EXC - UNDER 2 CMS                     |
| Z755C | RECTUM - POLYPS/TUMOURS ELECTROCOAG/EXC - OVER 2 CMS          |
| Z757C | EXC BENIGN ANAL LESION(S)                                     |
| Z761C | RECTUM POLYPS WITH ELECTROCOAGULATION OR EXCISION BASE 5 CM.+ |

\* Alharbi O, Rabeneck L, Sutradhar R, et al. A population-based analysis of outpatient colonoscopy in adults assisted by an anesthesiologist. *Anesthesiology* 2009;111:734-740.

Supplementary Table A3. Changes to OHIP codes relevant for colonoscopy since 2008/9

| New OHIP code | Definition                                                                                                                                                                                                                                | How to use new codes                                                                                                                                                                 | Year introduced |
|---------------|-------------------------------------------------------------------------------------------------------------------------------------------------------------------------------------------------------------------------------------------|--------------------------------------------------------------------------------------------------------------------------------------------------------------------------------------|-----------------|
| Z491A         | Colonoscopy, incomplete polyp resection – to descending colon                                                                                                                                                                             | These are “base” codes for colonoscopy and can be used interchangeably with Z555A, depending on the indication, e.g., Z49XA + E740A + E741A + E747A to indicate colonoscopy to cecum | 2013            |
| Z492A         | Colonoscopy, 5 year follow-up after normal colonoscopy (Z499) – to descending colon                                                                                                                                                       |                                                                                                                                                                                      | 2013            |
| Z493A         | Colonoscopy, 10 year follow-up after normal colonoscopy (Z497, Z555) – to descending colon                                                                                                                                                |                                                                                                                                                                                      | 2013            |
| Z494A         | Colonoscopy, Hereditary (e.g. Familial adenomatous Polyposis or Hereditary Non-Polyposis Colorectal Cancer) or other bowel disorders (e.g. inflammatory bowel disease) associated with increased risk of malignancy – to descending colon |                                                                                                                                                                                      | 2013            |
| Z495A         | Colonoscopy, follow-up of unsatisfactory (poor bowel preparation, incomplete) colonoscopy – to descending colon                                                                                                                           |                                                                                                                                                                                      | 2013            |
| Z496A         | Colonoscopy – presence of signs and symptoms – to descending colon                                                                                                                                                                        |                                                                                                                                                                                      | 2011            |
| Z497A         | Colonoscopy after positive FOBT, sigmoidoscopy, barium enema or CT scan – to descending colon                                                                                                                                             |                                                                                                                                                                                      | 2011            |
| Z498A         | Colonoscopy, follow-up of abnormal colonoscopy: tubular adenomas, advanced adenomas, sessile serrated adenomas – to descending colon                                                                                                      |                                                                                                                                                                                      | 2011            |
| Z499A         | Colonoscopy, family                                                                                                                                                                                                                       |                                                                                                                                                                                      | 2011            |

|       |                                                                                                        |                                                                                                  |      |
|-------|--------------------------------------------------------------------------------------------------------|--------------------------------------------------------------------------------------------------|------|
|       | history associated with increased risk – to descending colon                                           |                                                                                                  |      |
| Z555A | Absence of signs or symptoms or risk factors, 50 years of age or older - to descending colon*          | As described in main text, e.g., Z555A + E740A + E741A + E747A to indicate colonoscopy to cecum  | 1991 |
| E023C | Anesthesia for ocular surgery, examination under anesthesia, colonoscopy, sigmoidoscopy and cystoscopy | Add to the list of codes in Supplementary Table 2 in order to define anesthesiologist-assistance | 2011 |

\*Note that Z555A is retained however, definition is changed
