# Supplementary material
Source: PubMed Central journal article supplement (PMC6182115)
Supplement: supp_6.3.E330_2018-0013-original-submission.pdf [file supp_6.3.E330_2018-0013-original-submission.pdf]

1  
2  
3 **TITLE:** Validation of 5 key colonoscopy-related data elements from Ontario health  
4 administrative databases compared to the clinical record: A cross-sectional study.  
5  
6

7 **Short Title:** Validation of 5 key colonoscopy data elements  
8  
9

10 **AUTHORS:** Jill Tinmouth MD PhD<sup>1,2,3</sup>, Rinku Sutradhar PhD<sup>1,9</sup>, Ning Liu MSc<sup>1</sup>, Nancy  
11 N. Baxter MD PhD<sup>1,2,4</sup>, Lawrence Paszat MD MS<sup>1,3,9</sup>, Linda Rabeneck MD MPH<sup>1,2</sup>  
12  
13

14 <sup>1</sup>Institute for Clinical Evaluative Sciences, Toronto, Ontario, Canada

15 <sup>2</sup>Prevention & Cancer Control, Cancer Care Ontario, Toronto, Ontario, Canada

16 <sup>3</sup>Sunnybrook Research Institute, Toronto, Ontario, Canada

17 <sup>4</sup>Li Ka Shing Knowledge Institute, St. Michael's Hospital

18 <sup>9</sup>Dalla Lana School of Public Health, University of Toronto, Toronto, Ontario, Canada.  
19  
20  
21

22 **Word counts:** Main text 2499, Abstract 247  
23  
24

#### 25 **Authorship criteria**

26 Conception and design: Tinmouth, Paszat, Rabeneck

27 Analysis and interpretation of the data: Tinmouth, Sutradhar, Liu, Baxter, Paszat,  
28 Rabeneck

29 Drafting of the article: Tinmouth

30 Critical revision of the article for important intellectual content: Sutradhar, Liu,  
31 Baxter, Paszat, Rabeneck

32 Final approval of the article: Tinmouth, Sutradhar, Liu, Baxter, Paszat, Rabeneck  
33  
34  
35  
36  
37  
38  
39  
40  
41  
42  
43  
44  
45  
46  
47  
48  
49  
50  
51  
52  
53  
54  
55  
56  
57  
58  
59  
60

## **ABSTRACT**

**Background:** Colonoscopy is widely used but its quality is highly variable, which may adversely affect patients. Research and quality improvement initiatives in a variety of jurisdictions have sought to address this issue, often supported by the use of health administrative data. As these data are generally not collected for these purposes, it is critical to measure their validity prior to use. The aim of this study is to validate health administrative data definitions for 5 key colonoscopy elements compared to the clinical record.

**Methods:** We randomly sampled 1,962 colonoscopy and non-colonoscopy procedures from 28 hospitals and non-hospital endoscopy clinics between April 2008 and March 2009 in Ontario, Canada. Definitions for 5 key colonoscopy elements derived from the health administrative data were compared to the clinical record. Weighted and unweighted sensitivity and specificity, adjusted for clustering of patients within physicians, were calculated for each definition relative to the reference standard.

**Findings:** We abstracted 1,845 records; in 1,282, colonoscopy was intended or performed. The weighted sensitivity and specificity of colonoscopy case, non-hospital colonoscopy setting and anesthesiologist-assistance exceeded 95%. Weighted sensitivity for colonoscopy completeness and polypectomy exceeded 95% but specificity was less than 90%.

**Interpretation:** Ontario health administrative data definitions for 5 key colonoscopy data elements performed well, with acceptable sensitivities and specificities for use in research and quality improvement initiatives. In other jurisdictions where health administrative data are used for research or quality improvement, similar studies should be performed to ensure that these data are valid for these purposes.

## **INTRODUCTION**

Colonoscopy is common, essential for the management of gastrointestinal diseases. Colonoscopy has important risks, including perforation, bleeding and death.<sup>1</sup> Furthermore, there is considerable variation in the quality of colonoscopy.<sup>2, 3</sup> Patients are adversely affected by poor quality colonoscopy; such procedures are associated with missed colorectal cancers and cancer-related death.<sup>4</sup>

Colonoscopy practice standards<sup>5, 6</sup>, research<sup>7, 8</sup> and policy<sup>9, 10</sup> initiatives have been implemented to improve quality. The use of “routinely collected data”<sup>11</sup> such as health administrative data for these purposes is highly attractive as they are inexpensive to use, readily available, and can be captured uniformly across a health care payer or health system. These data are being used for funding, accountability and to measure performance and quality of care by government agencies.<sup>12</sup> However, as these data are often collected for other reasons,<sup>13, 14</sup> it is critical to ensure their validity when using them for these purposes. Thus far, colonoscopy validation studies have generally focused on procedure indication<sup>15-17</sup> and other aspects of colonoscopy have not been widely evaluated.

In Ontario, the Institute for Clinical Evaluative Sciences (ICES) houses health administrative databases containing the health care records for the population of Ontario. These databases have been used extensively in colonoscopy research<sup>1, 18-20</sup> and quality improvement<sup>21</sup> but to date, they have not been validated. The objective of this study was to validate health administrative data definitions for 5 key colonoscopy elements: colonoscopy case, colonoscopy setting, colonoscopy completeness, anesthesiologist-assistance and polypectomy.

## **METHODS**

**Overview:** In this multi-site chart abstraction study, we created health administrative definitions of 5 colonoscopy data elements: a 'colonoscopy case', colonoscopy setting, colonoscopy completeness, anesthesiologist-assistance and polypectomy. We compared these definitions to reference standards: clinical data obtained via chart abstraction at 23 hospitals and 5 non-hospital endoscopy clinics in Ontario, Canada. For some data elements, we included more than one health administrative definition and/or more than one reference standard. The clinical data largely comprised medical records of complete and incomplete colonoscopies but also included a number of gastroscopies and flexible sigmoidoscopies in order to allow estimation of the "true negative" rate for the case definition of colonoscopy. Ethics approval was obtained from Sunnybrook Health Sciences Centre Research Ethics Board as well as from the research ethics boards at the 23 hospitals where chart abstraction was performed.

**Sources of Administrative Data:** The Ontario Health Insurance Plan (OHIP) and the Canadian Institute for Health Information (CIHI) databases housed at ICES were used. OHIP contains physician billing data on inpatient and outpatient visits and procedures including colonoscopy since 1991. CIHI comprises diagnosis and procedure (both inpatient and 'same day') codes for all hospital admissions in Canada since 1988.

**Hospital and non-hospital endoscopy clinic sites:** We randomly selected 23 hospital and 5 non-hospital facilities in Ontario to participate in the study. The hospital sites were selected in a stratified fashion based on teaching/community status, size, and urban/rural status from hospitals performing more than 200 colonoscopies in the prior year (n=115) in the province. With the assistance of endoscopy equipment manufacturers, we identified 34 non-hospital clinics active during the study period. We randomly selected from among those who performed more than 200 colonoscopies in the prior year and indicated willingness to participate in the study (N=21 of 34 clinics). The non-hospital facilities were almost all located in urban areas and none are academic, therefore selection was stratified by high and low annual colonoscopy volumes only.

**Medical Record Abstraction:** All outpatient procedure visits for gastroscopy, flexible sigmoidoscopy and colonoscopy at the 28 facilities from April 1 2008 to March 31 2009 were identified using health administrative data (hospitals) or using self-reported billing data (clinics) and comprised the sampling frame (Figure 1). From the 144,078 procedures in the sampling frame, we then randomly selected 1,968 medical records for abstraction (the "sample") using a stratified sampling strategy

1  
2  
3 previously used by others<sup>22</sup>. The sample included complete colonoscopies (n=794),  
4 incomplete colonoscopies (n=806), gastroscopies (n=128), and flexible  
5 sigmoidoscopies (n= 240). The sampling strategy ensured adequate inclusion of less  
6 common events, such as incomplete colonoscopy, while maintaining a sample size  
7 feasible for medical record abstraction.  
8  
9

10  
11 At the 28 sites, trained ICES medical record abstractors, blinded to the  
12 administrative data, abstracted from 3 pre-specified sources, the endoscopist's  
13 procedure note, the anesthesiologist's record, and the pathologist's record using a  
14 standardized data collection protocol. The data were collected in a standardized  
15 fashion by the abstractors using a customized data collection platform residing on  
16 encrypted laptops. The data were then transmitted from each site to ICES via secure  
17 virtual private network. If the endoscopist's procedure note could not be found at  
18 the sites or if the dates for the procedure found in the medical record at abstraction  
19 did not agree with those in the administrative data, the case was excluded.  
20  
21  
22  
23

24  
25 Cohort creation: Three cohorts were created for the analyses:

26 (1) All successfully abstracted medical records – used to assess the health  
27 administrative data definition for colonoscopy case.  
28

29 (2) Medical records where either colonoscopy or flexible sigmoidoscopy was  
30 intended and colonoscopy codes were billed – used to evaluate the definition for  
31 colonoscopy completeness. Ontario physicians bill colonoscopy per segment  
32 reached; this data structure allows measurement of colonoscopy completeness.<sup>18</sup>  
33 Although there is a separate code for flexible sigmoidoscopy, anecdotally,  
34 colonoscopy codes are often used to bill this procedure as remuneration is better. As  
35 this practice may result in misclassification of incomplete colonoscopies when using  
36 the Ontario administrative data, flexible sigmoidoscopies billed with colonoscopy  
37 codes were included in the cohort. Individuals with prior total colectomy or right  
38 hemicolectomy were excluded.  
39

40 (3) Medical records where colonoscopy was intended or performed – used to test  
41 the remaining 3 colonoscopy data elements, colonoscopy setting, anesthesiologist-  
42 assistance and polypectomy.  
43  
44  
45  
46

47 Administrative data definitions and reference standards for colonoscopy data

48 elements: See Table 1 for definitions and reference standards for each data element.  
49 There were 14 alternative definitions for colonoscopy case because of the structure  
50 of OHIP colonoscopy codes: a base code (Z555A) must be used indicating that the  
51 scope was inserted to the level of the descending colon. Up to 4 additional "E" codes  
52 are then used for every additional segment of colon visualized. We evaluated  
53 colonoscopy completeness using 2 definitions of colonoscopy case: achieving either  
54  
55  
56  
57  
58  
59  
60

1  
2  
3 the cecum or terminal ileum among (1) colonoscopies identified using the most  
4 sensitive definition and (2) those identified using the most accurate definition,  
5 based on the analyses described below.  
6  
7

8  
9 Health administrative data definitions were compared to relevant reference  
10 standards. There were 2 reference standards for anesthesiologist-assistance  
11 (presence of anesthesiologist record, indicating an anesthesiologist attended the  
12 procedure; and propofol use documented in anesthetic record or endoscopist's  
13 procedure note) and polypectomy (polyp documented by endoscopist; and histology  
14 confirmation of adenoma, including advanced adenoma, or sessile serrated  
15 adenoma/polyp documented). See Supplementary Tables for a list of specific codes  
16 used and their definitions.  
17  
18  
19

20  
21 Sample size: We performed a sample size calculation a priori for the key data  
22 elements of colonoscopy case and colonoscopy completeness. Using methods for  
23 two-sided binomial tests,<sup>23</sup> we estimated that we would need at least 600 complete  
24 colonoscopy cases, 600 incomplete colonoscopy cases and 200 non-colonoscopy  
25 cases to have over 80% power (alpha = 0.05) to detect at least a 4% absolute  
26 difference in coding accuracy (assuming a coding accuracy proportion, determined  
27 by comparing the medical record data with the administrative data, of 0.85) within  
28 each group.  
29  
30  
31

32  
33 Analysis: Sensitivity and specificity with 95% confidence intervals were calculated  
34 for each administrative data definition relative to the relevant reference standard.  
35 The 95% confidence limits were adjusted for clustering of patients within  
36 physicians using the Taylor Series Expansion method.<sup>24</sup> Because we oversampled  
37 incomplete colonoscopy procedures, we performed both unweighted and weighted  
38 analyses, where the weights reflected the distribution of procedures in the sampling  
39 frame relative to those in the sample. Weighted results are presented unless there  
40 was important variation between weighted and unweighted results. For the  
41 colonoscopy case data element, we created a receiver operating curve by plotting  
42 the sensitivity (on the y-axis) and 1-specificity (on the x-axis) for the 14 definitions.  
43 The definition located in the upper left hand corner of this curve was defined as the  
44 most accurate as per the Youden method.<sup>25</sup>  
45  
46  
47  
48  
49  
50  
51  
52  
53  
54  
55  
56  
57  
58  
59  
60

## **RESULTS**

Of the 1,968 randomly selected endoscopy procedures, 1845 were successfully abstracted (see Figure 1 for exclusions). Of these, colonoscopy was intended or performed in 1282 cases. Approximately 25% of patients undergoing included procedures were under age 50, over half were women and 15% were performed in non-hospital endoscopy clinics (Table 2). In the 23 hospitals, 7 to 153 charts were abstracted per hospital while in the 5 non-hospital clinics 31 to 86 were abstracted per clinic.

Fourteen definitions of a colonoscopy case were evaluated (Figure 2 and Figure 3). The most sensitive definition was the base colonoscopy code, Z555A, with or without one or more additional E codes. However, this definition was also the least specific. The most accurate definition was base code plus the code “to hepatic flexure” (Z555A + E741A) with or without additional E codes.

All 3 administrative data definitions for non-hospital clinic setting were found to have sensitivities and specificities in excess of 95% (Figure 4). The first two applied criteria using either OHIP codes alone or using CIHI codes alone; when used simultaneously, there was minor loss of sensitivity.

The sensitivity and specificity for colonoscopy completeness differed depending on the definition of colonoscopy case and whether they were weighted or unweighted (Figure 4). Regardless of the colonoscopy case definition, the weighted sensitivity exceeded 95% and the weighted specificity was poor (<80%). All unweighted estimates were approximately 95% or higher with one exception - the unweighted sensitivity using the most sensitive colonoscopy definition was 70.2%.

The sensitivity and specificity of the administrative data definition for anaesthesiologist-assisted colonoscopy exceeded 95% using either presence of anaesthesiologist record (indicating an anaesthesiologist attended the procedure) or the use of propofol as a sedating agent (Figure 4) as the reference standard.

Three administrative data definitions of polypectomy were evaluated compared to 2 reference standards, polyp seen/removed or histology (Figure 4). Using more codes improved the sensitivity but worsened specificity. These definitions were more sensitive but less specific when the reference standard was histology vs. polyp seen/removed.

## **DISCUSSION**

We have demonstrated that health administrative data definitions of colonoscopy case, colonoscopy setting and anesthesiologist-assistance perform well when compared to the medical record. The weighted definitions of colonoscopy completeness were sensitive but not specific. The definitions of polypectomy performed less well for the identification of the more clinically relevant reference standard, histologically significant polyps (adenomas and sessile serrated adenomas/polyps), than they did for 'polyp seen or removed'.

Many health administrative colonoscopy data validation studies to date have focused on colonoscopy indication.<sup>15-17</sup> However, health administrative data are being used to evaluate and measure other aspects of colonoscopy, including completeness,<sup>18</sup> type of setting,<sup>19, 26</sup> polypectomy rate/adenoma detection rate,<sup>4, 27</sup> anesthesiologist-assistance,<sup>19, 20, 28, 29</sup> complications<sup>1, 29</sup> and missed cancers.<sup>4, 26</sup> As such, our study validates the use of health administrative data for many of these other aspects of colonoscopy.

In our study, we found that the most accurate definition of colonoscopy incorporates codes indicating that the endoscopist reached the hepatic flexure. However, in practice, other definitions may be used depending on context, e.g., for studies on perforation (as the procedure may be aborted if perforation is recognized)<sup>30</sup>. One other study also found that the health administrative data identified colonoscopy procedures accurately.<sup>31</sup> Accurate ascertainment of colonoscopy cases is important for research and performance measurement using health administrative data. For example, low volume endoscopists have been shown to have higher rates of complications.<sup>1</sup>

Our results for colonoscopy completeness must be interpreted in light of the differences in the weighted and unweighted results. Given the stratified sampling procedure used, we would expect the weighted results to be more valid than the unweighted results as long as the distribution of procedures in our sampling frame is representative of the distribution in the underlying population. The weighted results indicate that the administrative data definitions for colonoscopy completeness are sensitive but less specific, which would occur if the endoscopist billed for a complete colonoscopy but in fact it was not complete. In a study of 15,168 colonoscopies where Medicare claims were matched to records in the Clinical Outcomes Research Initiative (CORI) database, the Medicare data also failed to identify incomplete colonoscopies accurately.<sup>32</sup>



1  
2  
3 We found that the administrative data definition comprising codes for removal of a  
4 polyp 3 mm or larger, for fulguration, and for removal of large polyps greater than 3  
5 cm was highly specific but the sensitivity was 76.9%. This specificity is comparable  
6 to that reported in the study of Medicare data described above<sup>32</sup> and to a second  
7 study<sup>33</sup> from Quebec, Canada, however the sensitivities reported in the Medicare  
8 and Quebec studies were better (92% and 86% respectively). We found that the  
9 administrative data definition described above performed reasonably well for the  
10 more clinically relevant reference standard of adenoma or sessile serrated  
11 adenoma/polyp, although the false negative and false positive rates were 20% and  
12 13%, respectively. While others have shown a strong correlation between  
13 endoscopist polypectomy rate and adenoma detection rate,<sup>34</sup> ours is the first to  
14 report the test characteristics of using polypectomy codes as a surrogate for  
15 histologically significant polyps.  
16  
17  
18  
19  
20  
21

22 Routinely collected data, such as health administrative data, are widely used for  
23 research but also by health care systems and funders in North America and Europe  
24 to allocate funds and monitor quality.<sup>12, 13, 35, 36</sup> However, data inaccuracies can lead  
25 to disease or exposure misclassification,<sup>37</sup> to the inability to identify sources of bias  
26 and to inaccurate conclusions.<sup>11, 38</sup> There are examples of such data issues in the  
27 colonoscopy literature.<sup>39</sup> For these reasons, recent guidelines for the reporting of  
28 studies conducted using “routinely collected data”, such as health administrative  
29 data, recommend that the validation of codes or algorithms used be described.<sup>11</sup>  
30 Validation enhances credibility and transparency of studies using health  
31 administrative data, which is important for uptake of findings<sup>40</sup> by scientific and  
32 policy consumers and application of algorithms by other scientists.<sup>38</sup>  
33  
34  
35  
36  
37

38 The research approach maximizes the internal and external validity. We employed  
39 trained, blinded, chart abstractors who used a standardized data collection tool. The  
40 sample was large and representative of regional and facility differences. We used a  
41 rigorous sampling strategy that randomly selected institutions and procedures and  
42 ensured adequate inclusion of rare events. However, this approach, which  
43 necessitates the use of weighted cases, also introduces a potential limitation as  
44 inaccuracies may occur if the selected cases are not representative of the underlying  
45 sampling frame. While we validated Ontario data sources specifically, our methods  
46 and our central message - the importance of validating health administrative data -  
47 are broadly applicable to other jurisdictions.  
48  
49  
50  
51  
52

53 In sum, we have rigorously validated 5 colonoscopy data elements that are routinely  
54 used in health administrative data studies of colonoscopy, for quality assurance  
55 purposes and to guide health policy. The methods described here are reproducible  
56  
57  
58  
59  
60

1  
2  
3  
4  
5  
6  
7  
8  
9  
10  
11  
12  
13  
14  
15  
16  
17  
18  
19  
20  
21  
22  
23  
24  
25  
26  
27  
28  
29  
30  
31  
32  
33  
34  
35  
36  
37  
38  
39  
40  
41  
42  
43  
44  
45  
46  
47  
48  
49  
50  
51  
52  
53  
54  
55  
56  
57  
58  
59  
60

and should be replicated for routinely collected data for colonoscopy used in other jurisdictions. It is paramount to ensure that these sources of “big data” are sufficiently accurate given their increasingly influential role in research and the delivery of health care globally.

Confidential

### **ACKNOWLEDGEMENTS**

This study was funded by the Canadian Cancer Society Research Institute and Cancer Care Ontario. The opinions, results and conclusions reported in this paper are those of the authors and are independent from the funding sources. This study was supported by ICES, which is funded by an annual grant from the Ontario Ministry of Health and Long-Term Care. The opinions, results and conclusions reported in this paper are those of the authors and are independent from the funding sources. No endorsement by ICES or the Ontario MOHLTC is intended or should be inferred. Parts of this material are based on data and information compiled and provided by CIHI. However, the analyses, conclusions, opinions and statements expressed herein are those of the author, and not necessarily those of CIHI. Dr. Tinmouth is the recipient of a Canadian Institutes of Health Research Embedded Clinician Researcher Award.

### **DECLARATION OF INTERESTS**

Cancer Care Ontario is a provincial government agency that acts as primary advisory on matters related to cancer to the Ontario Ministry of Health and Long-Term Care. Dr. Tinmouth is employed by Cancer Care Ontario as the Lead Scientist of Ontario's colorectal cancer screening program, ColonCancerCheck. Dr. Baxter is employed by Cancer Care Ontario as the Provincial Lead for the Gastrointestinal Endoscopy Quality Based Procedures program. Dr. Rabeneck is employed by Cancer Care Ontario as the Vice-President of Prevention and Cancer Control. The remaining authors have no conflicts of interest to report.

1  
2  
3  
4  
5  
6  
7  
8  
9  
10  
11  
12  
13  
14  
15  
16  
17  
18  
19  
20  
21  
22  
23  
24  
25  
26  
27  
28  
29  
30  
31  
32  
33  
34  
35  
36  
37  
38  
39  
40  
41  
42  
43  
44  
45  
46  
47

Table 1. Description of the cohorts, administrative data definitions and the reference standards for 5 colonoscopy data elements.

| Colonoscopy Data Element    | Cohort, size                                               | Administrative Data Definition                                                                                                                                                                                                                                                                        | Reference Standard                                                                                                                                                                                                                         |
|-----------------------------|------------------------------------------------------------|-------------------------------------------------------------------------------------------------------------------------------------------------------------------------------------------------------------------------------------------------------------------------------------------------------|--------------------------------------------------------------------------------------------------------------------------------------------------------------------------------------------------------------------------------------------|
| Colonoscopy case            | All successfully abstracted charts, n=1845                 | OHIP codes: Z555A alone or in combination with any of: E740A, E741A, E747A OR E705A. 14 of the most clinically plausible combinations were evaluated (see Figure 3 for specifics).                                                                                                                    | Performed or intended to perform colonoscopy according to <u>endoscopist's procedure note</u>                                                                                                                                              |
| Non-hospital clinic         | Charts where colonoscopy was intended or performed, n=1282 | <ol style="list-style-type: none"> <li>1. OHIP code E649A billed on date of colonoscopy</li> <li>2. No record in CIHI overlapping with date of colonoscopy according to OHIP (i.e., no record of the procedure being done in hospital)</li> <li>3. E649A AND no overlapping record in CIHI</li> </ol> | Presence of <u>endoscopist's procedure note</u> in non-hospital facility chart                                                                                                                                                             |
| Anesthesiologist-assistance | Charts where colonoscopy was intended or performed, n=1282 | OHIP codes for anesthesia (003C or procedure code with "C" suffix, see Supplementary Tables) billed on date as colonoscopy on same patient                                                                                                                                                            | <ol style="list-style-type: none"> <li>1. Presence of <u>anesthesiologist record</u> on chart, regardless of type of sedating agent</li> <li>2. Use of propofol as sedating agent according to <u>anesthesiologist's record</u></li> </ol> |

| Colonoscopy Data Element  | Cohort, size                                                                                                                                                                              | Administrative Data Definition                                                                                                                                                                                                                                                                                                                                              | Reference Standard                                                                                                                                                                                                                                  |
|---------------------------|-------------------------------------------------------------------------------------------------------------------------------------------------------------------------------------------|-----------------------------------------------------------------------------------------------------------------------------------------------------------------------------------------------------------------------------------------------------------------------------------------------------------------------------------------------------------------------------|-----------------------------------------------------------------------------------------------------------------------------------------------------------------------------------------------------------------------------------------------------|
| Colonoscopy completeness* | Charts where procedure billed with colonoscopy codes and colonoscopy or flexible sigmoidoscopy was intended**, n=1477 (administrative data def'n 1), n=1016 (administrative data def'n 2) | <ol style="list-style-type: none"> <li>OHIP codes E747A (to cecum) OR E705A (to terminal ileum) billed among colonoscopies defined using most sensitive definition (Z555A +/- other E codes)</li> <li>OHIP codes E747A (to cecum) OR E705A (to terminal ileum) billed among colonoscopies defined using most accurate definition (Z555A +E741 +/- other E codes)</li> </ol> | Colonoscopy 'intended' and 'complete' according to the <u>endoscopist's procedure note</u>                                                                                                                                                          |
| Polypectomy#              | Charts where colonoscopy was intended or performed%, n= 1256 (reference standard 1), n=1252 (reference standard 2)                                                                        | <ol style="list-style-type: none"> <li>OHIP code Z571A alone</li> <li>OHIP codes Z571A OR Z570A or E685A</li> <li>OHIP codes Z571A OR Z570A or E685A OR E717A</li> </ol>                                                                                                                                                                                                    | <ol style="list-style-type: none"> <li>Polyp visualized or polypectomy described according to <u>endoscopist's procedure note</u></li> <li>Adenoma, advanced adenoma or sessile serrated polyp according the <u>pathologist's report</u></li> </ol> |

\*Procedures intended as a flexible sigmoidoscopy where E747A or E705A was billed were classified as "false positive".

Procedures intended as a flexible sigmoidoscopy where E747A and E705A were not billed were classified as "false negative".

\*\*Excluding those with prior total or right hemicolectomy.

#Histology of the polyp is not available in administrative databases, therefore cannot define adenoma using these data

%Excluding those with missing data for reference standard.

OHIP = Ontario Health Insurance Plan (physician billing database).

CIHI = Canadian Institute for Health Information (hospital billing database).

Endoscopist's procedure note: completed by the endoscopist, includes a description of the procedure including findings

Anesthesiologist's record: completed by the anesthesiologist, record of anesthetic administered during procedure

Pathologist's report: report on the histology of specimens, such as polyps, obtained at colonoscopy.

Table 2. Patient and procedure characteristics, for 2 cohorts: (1) all abstracted charts and (2) charts where a colonoscopy was intended or performed.

| Characteristic                | All successfully abstracted charts (N=1,845) | Charts where colonoscopy was intended or performed (N=1,282) |
|-------------------------------|----------------------------------------------|--------------------------------------------------------------|
| Age group, in years           |                                              |                                                              |
| <50                           | 469 (25.4%)                                  | 251 (19.6%)                                                  |
| 50-59                         | 517 (28.0%)                                  | 395 (30.8%)                                                  |
| 60-69                         | 430 (23.3%)                                  | 327 (25.5%)                                                  |
| 70-74                         | 174 (9.4%)                                   | 134 (10.4%)                                                  |
| >74                           | 255 (13.8%)                                  | 175 (13.7%)                                                  |
| Sex                           |                                              |                                                              |
| Female                        | 986 (53.4%)                                  | 709 (55.3%)                                                  |
| Male                          | 859 (46.6%)                                  | 573 (44.7%)                                                  |
| Procedures performed*         |                                              |                                                              |
| CS only                       | 1,143 (62.0%)                                | 1,125 (87.8%)                                                |
| EGD only                      | 45 (2.4%)                                    | ≤ 5                                                          |
| FS only                       | 432 (23.4%)                                  | ≤ 5                                                          |
| CS & EGD                      | 200 (10.8%)                                  | 151 (11.8%)                                                  |
| FS & EGD                      | 12 (0.7%)                                    | ≤ 5                                                          |
| CS & other procedure          | ≤ 5                                          | ≤ 5                                                          |
| FS & other procedure          | ≤ 5                                          | 0                                                            |
| Other procedure only          | 6 (0.3%)                                     | 0                                                            |
| Neighbourhood income quintile |                                              |                                                              |
| Low                           | 300 (16.3%)                                  | 205 (16.0%)                                                  |
| 2                             | 331 (17.9%)                                  | 225 (17.6%)                                                  |
| 3                             | 337 (18.3%)                                  | 233 (18.2%)                                                  |
| 4                             | 393 (21.3%)                                  | 265 (20.7%)                                                  |
| High                          | 474 (25.7%)                                  | 348 (27.1%)                                                  |
| Missing                       | 10 (0.5%)                                    | 6 (0.5%)                                                     |
| Setting                       |                                              |                                                              |
| Non-hospital clinic           | 284 (15.4%)                                  | 216 (16.8%)                                                  |
| Hospital                      | 1561 (84.6%)                                 | 1,066 (83.2%)                                                |

\*Based on findings at chart abstraction

CS = colonoscopy

EGD = esophagogastroduodenoscopy

FS = flexible sigmoidoscopy

1  
2  
3 **FIGURE LEGENDS**  
4

5 Figure 1. Flow chart describing sampling of facilities and procedures  
6

7  
8 Figure 2. Weighted sensitivity and specificity of 14 administrative data definitions  
9 using Ontario Health Insurance Plan (OHIP) codes of colonoscopy case compared to  
10 the reference standard of colonoscopy intended or performed according to the  
11 medical record.  
12

13  
14 Figure 3. Receiver operating curve of the 14 definitions for colonoscopy case.  
15

16 Figure 4. Sensitivity and specificity of non-hospital setting, colonoscopy  
17 completeness, anesthesiologist-assistance and polypectomy compared to reference  
18 standards.  
19  
20  
21  
22  
23  
24  
25  
26  
27  
28  
29  
30  
31  
32  
33  
34  
35  
36  
37  
38  
39  
40  
41  
42  
43  
44  
45  
46  
47  
48  
49  
50  
51  
52  
53  
54  
55  
56  
57  
58  
59  
60

Confidential

## **REFERENCES**

1. Rabeneck L, Paszat LF, Hilsden RJ, Saskin R, Leddin D, Grunfeld E, et al. Bleeding and perforation after outpatient colonoscopy and their risk factors in usual clinical practice. *Gastroenterology*. 2008;135(6):1899-906.
2. Hilsden RJ, Dube C, Heitman SJ, Bridges R, McGregor SE, Rostom A. The association of colonoscopy quality indicators with the detection of screen-relevant lesions, adverse events, and postcolonoscopy cancers in an asymptomatic Canadian colorectal cancer screening population. *Gastrointest Endosc*. 2015;82(5):887-94.
3. Bowles CJ, Leicester R, Romaya C, Swarbrick E, Williams CB, Epstein O, et al. A prospective study of colonoscopy practice in the UK today: are we adequately prepared for national colorectal cancer screening tomorrow? *Gut*. 2004;53(2):277-83.
4. Corley DA, Jensen CD, Marks AR, Zhao WK, Lee JK, Doubeni CA, et al. Adenoma detection rate and risk of colorectal cancer and death. *N Engl J Med*. 2014;370(14):1298-306.
5. Rees CJ, Thomas Gibson S, Rutter MD, Baragwanath P, Pullan R, Feeney M, et al. UK key performance indicators and quality assurance standards for colonoscopy. *Gut*. 2016.
6. Tinmouth J, Kennedy E, Baron D, Burke M, Feinberg S, Gould M, et al. Colonoscopy quality assurance in Ontario: Systematic review and clinical practice guideline. *Can J Gastroenterol Hepatol*. 2014;28(5):251-74.
7. Kaminski MF, Anderson J, Valori R, Kraszewska E, Rupinski M, Pachlewski J, et al. Leadership training to improve adenoma detection rate in screening colonoscopy: a randomised trial. *Gut*. 2016;65:616-24.
8. Coe SG, Crook JE, Diehl NN, Wallace MB. An endoscopic quality improvement program improves detection of colorectal adenomas. *Am J Gastroenterol*. 2013;08(2):219-26.
9. Alberta Health Services. Forzani & MacPhail Colon Cancer Screening Centre: Quality Assurance 2016 [Available from: <http://www.albertahealthservices.ca/info/Page8336.aspx>].
10. Quality Management Partnership. Quality Management Partnership: Colonoscopy [Available from: <https://www.qmpontario.ca/colonoscopy/>].
11. Benchimol EI, Smeeth L, Guttman A, Harron K, Moher D, Petersen I, et al. The REporting of studies Conducted using Observational Routinely-collected health Data (RECORD) statement. *PLoS Med*. 2015;12(10):e1001885.
12. Rothbard A. Quality Issues in the Use of Administrative Data Records. In: Fantuzzo J, Culhane DP, editors. *Actionable intelligence: Using integrated data systems to achieve a more effective, efficient, and ethical government*. New York: Palgrave Macmillan US; 2015. p. 77-103.
13. Logan JR, Lieberman DA. The use of databases and registries to enhance colonoscopy quality. *Gastrointest Endosc Clin N Am*. 2010;20(4):717-34.
14. De Coster C, Li B, Quan H. Comparison and validity of procedures coded With ICD-9-CM and ICD-10-CA/CCI. *Med Care*. 2008;46(6):627-34.



15. Groenen MJ, van Buuren HR, van Berge Henegouwen GP, Fockens P, van der Lei J, Stuifbergen WN, et al. Validation study of automatically generated codes in colonoscopy using the endoscopic report system Endobase. *Scand J Gastroenterol.* 2010;45(9):1121-6.
16. Lee JK, Jensen CD, Lee A, Doubeni CA, Zauber AG, Levin TR, et al. Development and validation of an algorithm for classifying colonoscopy indication. *Gastrointest Endosc.* 2015;81(3):575-82.e4.
17. Fisher DA, Grubber JM, Castor JM, Coffman CJ. Ascertainment of colonoscopy indication using administrative data. *Dig Dis Sci.* 2010;55(6):1721-5.
18. Baxter NN, Goldwasser MA, Paszat LF, Saskin R, Urbach DR, Rabeneck L. Association of colonoscopy and death from colorectal cancer. *Ann Intern Med.* 2009;150(1):1-8.
19. Alharbi O, Rabeneck L, Sutradhar R, Wijeyesundera D, Yun L, Paszat L, et al. A population-based analysis of outpatient colonoscopy in adults assisted by an anesthesiologist. *Anesthesiology.* 2009;111(4):734-40.
20. Bielawska B, Hookey LC, Sutradhar R, Whitehead M, Xu J, Paszat LF, et al. Anesthesia Assistance in Outpatient Colonoscopy and Risk of Aspiration Pneumonia, Bowel Perforation, and Splenic Injury. *Gastroenterology.* 2018;154(1):77-85.e3.
21. Quality Management Partnership. Building on strong foundations: Inaugural report on quality in colonoscopy, mammography and pathology. 2015 November 2015. Report No.
22. Steele LS, Glazier RH, Lin E, Evans M. Using administrative data to measure ambulatory mental health service provision in primary care. *Med Care.* 2004;42:960-5.
23. Rosner B. *Fundamentals of biostatistics* 6th ed. Boston, MA: Duxbury Press; 2006.
24. Casella G, Berger RL. *Statistical Inference.* Belmont, CA: Duxbury Press; 1990.
25. Youden WJ. Index for rating diagnostic tests. *Cancer.* 1950;3(1):32-5.
26. Bressler B, Paszat LF, Chen Z, Rothwell DM, Vinden C, Rabeneck L. Rates of new or missed colorectal cancers after colonoscopy and their risk factors: a population-based analysis. *Gastroenterology.* 2007;132:96-102.
27. Baxter NN, Sutradhar R, Forbes SS, Paszat LF, Saskin R, Rabeneck L. Analysis of administrative data finds endoscopist quality measures associated with postcolonoscopy colorectal cancer. *Gastroenterology.* 2011;140(1):65-72.
28. Dominitz JA, Baldwin LM, Green P, Kreuter WI, Ko CW. Regional variation in anesthesia assistance during outpatient colonoscopy is not associated with differences in polyp detection or complication rates. *Gastroenterology.* 2013;144(2):298-306.
29. Wernli KJ, Brenner AT, Rutter CM, Inadomi JM. Risks Associated With Anesthesia Services During Colonoscopy. *Gastroenterology.* 2016;150(4):888-94; quiz e18.
30. Cancer Quality Council of Ontario. Technical Information. Colorectal Cancer Screening Follow-Up Toronto, ON: Cancer Care Ontario; 2016 [Available from: [http://www.csqi.on.ca/by\\_patient\\_journey/screening/colorectal\\_screening\\_follow\\_up/technical\\_info/](http://www.csqi.on.ca/by_patient_journey/screening/colorectal_screening_follow_up/technical_info/)].

- 1  
2  
3  
4  
5  
6  
7  
8  
9  
10  
11  
12  
13  
14  
15  
16  
17  
18  
19  
20  
21  
22  
23  
24  
25  
26  
27  
28  
29  
30  
31  
32  
33  
34  
35  
36  
37  
38  
39  
40  
41  
42  
43  
44  
45  
46  
47  
48  
49  
50  
51  
52  
53  
54  
55  
56  
57  
58  
59  
60
31. Li X, Hilsden R, Hossain S, Fleming J, Winget M. Validation of administrative data sources for endoscopy utilization in colorectal cancer diagnosis. *BMC Health Serv Res.* 2012;12:358.
  32. Ko CW, Dominitz JA, Green P, Kreuter W, Baldwin LM. Accuracy of Medicare claims for identifying findings and procedures performed during colonoscopy. *Gastrointest Endosc.* 2011;73(3):447-53.e1.
  33. Wyse JM, Joseph L, Barkun AN, Sewitch MJ. Accuracy of administrative claims data for polypectomy. *CMAJ.* 2011;183(11):E743-7.
  34. Patel NC, Islam RS, Wu Q, Gurudu SR, Ramirez FC, Crowell MD, et al. Measurement of polypectomy rate by using administrative claims data with validation against the adenoma detection rate. *Gastrointest Endosc.* 2013;77(3):390-4.
  35. Rahal R, Chadder J, DeCaria K, G. L, Bryant H, for the System Performance Steering Committee and the Technical Working Group. How different is cancer control across Canada? Comparing performance indicators for prevention, screening, diagnosis, and treatment. *Curr Oncol.* 2017;24(2):124-8.
  36. Smith PC, Mossialos E, Papanicolas I. Performance measurement for healthsystem improvement:experiences, challenges and prospects. Copenhagen: 2008.
  37. Manuel DG, Lim JJ, Tanuseputro P, Stukel TA. How many people have had a myocardial infarction? Prevalence estimated using historical hospital data. *BMC Public Health.* 2007;7:174.
  38. Benchimol EI, Manuel DG, To T, Griffiths AM, Rabeneck L, Guttman A. Development and use of reporting guidelines for assessing the quality of validation studies of health administrative data. *J Clin Epidemiol.* 2011;64(8):821-9.
  39. Gotfried J, Bernstein M, Ehrlich AC, Friedenber FK. Administrative database research overestimates the rate of interval colon cancer. *J Clin Gastroenterol.* 2015;49(6):483-90.
  40. Morrato EH, Elias M, Gericke CA. Using population-based routine data for evidence-based health policy decisions: lessons from three examples of setting and evaluating national health policy in Australia, the UK and the USA. *J Public Health.* 2007;29(4):463-71.

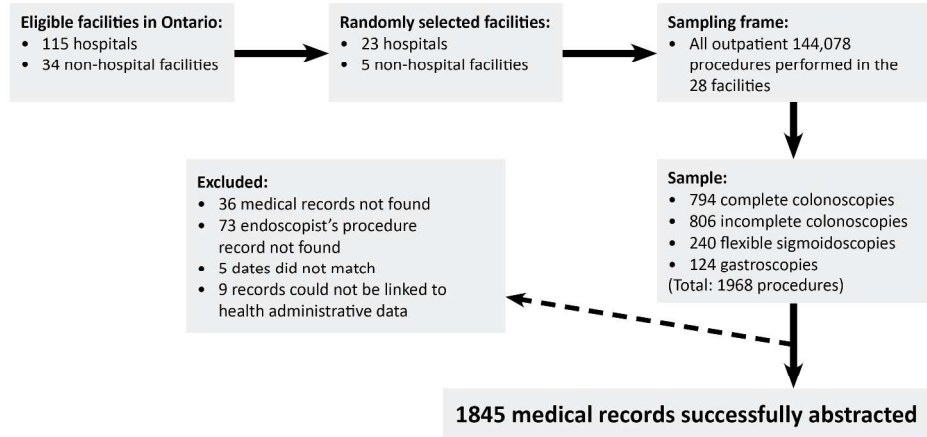

Figure 1. Flow chart describing sampling of facilities and procedures

279x146mm (300 x 300 DPI)

1  
2  
3  
4  
5  
6  
7  
8  
9  
10  
11  
12  
13  
14  
15  
16  
17  
18  
19  
20  
21  
22  
23  
24  
25  
26  
27  
28  
29  
30  
31  
32  
33  
34  
35  
36  
37  
38  
39  
40  
41  
42  
43  
44  
45  
46  
47  
48  
49  
50  
51  
52  
53  
54  
55  
56  
57  
58  
59  
60

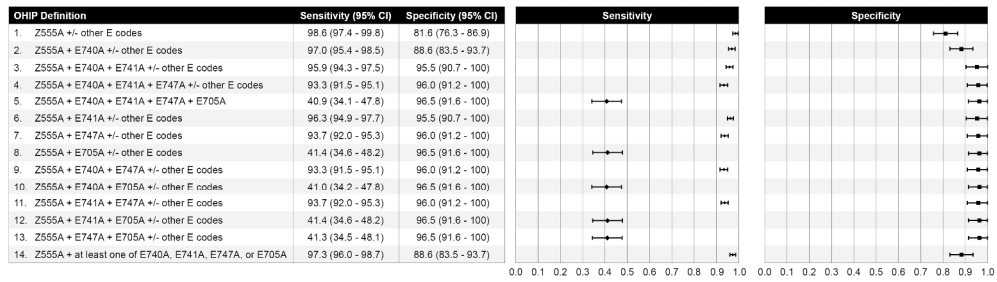

Figure 2. Weighted sensitivity and specificity of 14 administrative data definitions using Ontario Health Insurance Plan (OHIP) codes of colonoscopy case compared to the reference standard of colonoscopy intended or performed according to the medical record.

285x82mm (300 x 300 DPI)

Confidential

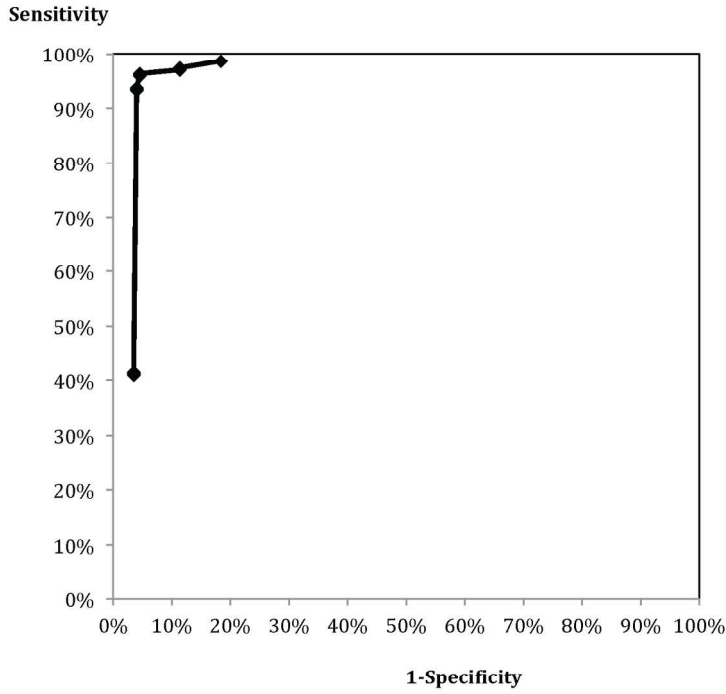

---

\*Upper left point of curve corresponds to OHIP definition #6: Z555A + E741A +/- other E codes

Figure 3. Receiver operating curve of the 14 definitions for colonoscopy case.

171x158mm (300 x 300 DPI)

1  
2  
3  
4  
5  
6  
7  
8  
9  
10  
11  
12  
13  
14  
15  
16  
17  
18  
19  
20  
21  
22  
23  
24  
25  
26  
27  
28  
29  
30  
31  
32  
33  
34  
35  
36  
37  
38  
39  
40  
41  
42  
43  
44  
45  
46  
47  
48  
49  
50  
51  
52  
53  
54  
55  
56  
57  
58  
59  
60

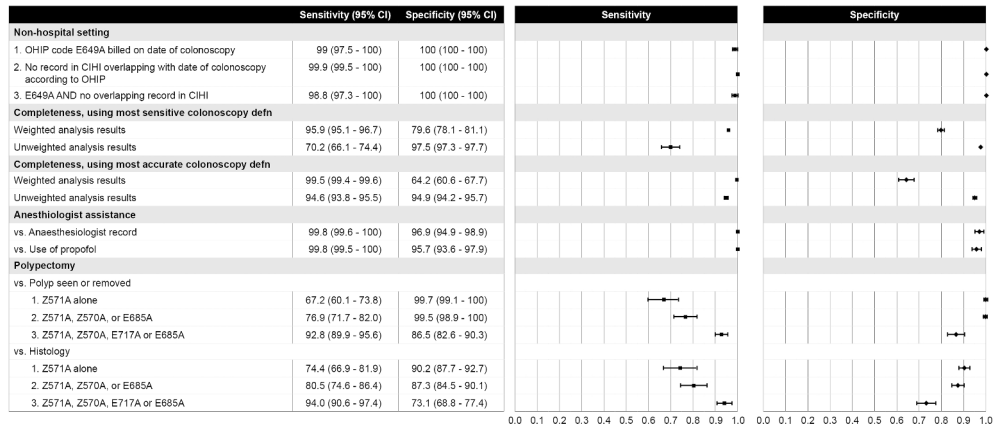

Figure 4. Sensitivity and specificity of non-hospital setting, colonoscopy completeness, anesthesiologist-assistance and polypectomy compared to reference standards.

285x124mm (300 x 300 DPI)

Confidential

Supplementary Table 1. Description of OHIP codes used in the current study.

| <b>OHIP Billing Code</b>                            | <b>OHIP Billing Code Description</b>                         |
|-----------------------------------------------------|--------------------------------------------------------------|
| <b>Colonoscopy and related codes</b>                |                                                              |
| Z555A                                               | INTESTINES-ENDOSCOPY-COLONOSCOPY INTO DESCENDING COLON       |
| E740A                                               | INTESTINE ENDO SIGMOID TO SPLENIC FLEXURE ADD                |
| E741A                                               | INTESTINE END SIGMOID TO HEPATIC FLEXURE ADD                 |
| E747A                                               | INTESTINE-ENDOSCOPY-SIGMOID.TO CAECUM ADD TO Z512/Z555       |
| E705A                                               | DIGEST.SYST.INTEST.ENDOSC.INTO TERMINAL ILEUM,ADD.           |
| E749A                                               | DIGEST SYST.-WHEN Z512,555,580 PERFORMED OUT HOSP....ADD     |
| Z570A                                               | INTESTINES-EXCISION-FULGURATION OF POLYPS THRO.COLONOSCOPE   |
| Z571A                                               | INTESTINES-EXC.-POLYPS THRO. COLONOSCOPE                     |
| E685A                                               | INTESTINES,ENDOSCOPY TOTAL EXCISION >3CM SESSILE POLYPS      |
| <b>Gastroscopy and flexible sigmoidoscopy codes</b> |                                                              |
| Z399A                                               | OESOPHAGUS-OESOPHAGO/GASTRO. WITH/OUT DUODENOSCOPY           |
| Z515A                                               | DIGEST.SYST.OESOPHAGOSCOPY WITH/OUT BIOPSY(S)                |
| Z523A                                               | OESOPHAGUS-DILATION OF OESOPHAGUS-GUIDED(String,WIRE)        |
| Z525A                                               | OESOPHAGUS-DILATION-OESOPH.-PNEUMATIC                        |
| Z527A                                               | STOMACH-ENDOSCOPY-GASTROSCOPY                                |
| Z528A                                               | STOMACH-ENDOSCOPY-GASTROSCOPY-SUBSEQ.                        |
| Z532A                                               | PERCUT ENDOSCOPC GASTROSTMY-REV Z CD & INCR FEE TO 1/2 S118  |
| Z547A                                               | STOMACH-ENDOSCOPY GASTROSCOPY WITH REMOVAL FOREIGN BODY      |
| Z580A                                               | INTESTINE-ENDOSCOPY-USING 60C.M. FLEXIBLE ENDOSCOPE.         |
| <b>Colectomy codes</b>                              |                                                              |
| S166A                                               | INTESTINE-EXC.-SML+LGE INTESTINE-TERM.ILEUM-CAECUM ASC.COLON |
| S168A                                               | INTESTINE-EXC.-ILEOSTOMY.SUBTOTAL COLECTOMY                  |
| S169A                                               | INTESTINE-EXC-TOTAL COLECTOMY W/ILEO-RECTAL ANASTOMOSIS.     |
| S170A                                               | INTESTINE-EXC.-ILEOSTOMY+TTLCOLECTOMY+ABDOM-PERIN.RESECTION  |
| S172A                                               | INTESTINE-EXC.-TOTAL COLECTOMY WITH LOOP ILEOSTOMY.          |
| S214A                                               | RECTUM-EXC.-PROCTECTOMY-ABDOMINO-PERINEAL RESEC/PULL THRU    |

1  
2  
3  
4  
5  
6  
7  
8  
9  
10  
11  
12  
13  
14  
15  
16  
17  
18  
19  
20  
21  
22  
23  
24  
25  
26  
27  
28  
29  
30  
31  
32  
33  
34  
35  
36  
37  
38  
39  
40  
41  
42  
43  
44  
45  
46  
47  
48  
49  
50  
51  
52  
53  
54  
55  
56  
57  
58  
59  
60

|       |                                                       |
|-------|-------------------------------------------------------|
| S215A | RECTUM-EXC.PROCTECTOMY-2 SURG. TEAM ABDOMINAL SURGEON |
| S216A | RECTUM-EXC.-PROCTECTOMY-2 SURG. TEAM PERINEAL SURGEON |

Confidential



Supplementary Table 2. OHIP billing codes used in analysis to identify anaesthesia assistance. This list was empirically derived from Ontario health administrative data by identifying endoscopy-related and anesthesia codes with "C" suffix billed +/- 1 day of a colonoscopy from 1993-2005.\*

| <b>OHIP Billing Code</b> | <b>OHIP Billing Code Description</b>                                                                                |
|--------------------------|---------------------------------------------------------------------------------------------------------------------|
| E003C                    | ASST./ANAE. ATTEND. - MONITORING/CARE                                                                               |
| E747C                    | ENDOSC SIGMOID TO CAECUM, ADD TO Z512/Z555                                                                          |
| S119C                    | PERCUTANEOUS ENDOSCOPIC GASTROSTOMY                                                                                 |
| S236C                    | ESOPHAGUS - ENDOSCOPIC ULTRASOUND USING LINEAR OR RADIAL ECHO-ENDOSCOPE - EXCLUDING BILIARY OR PANCREATIC EXAM.     |
| S237C                    | ESOPHAGUS - ENDOSCOPIC ULTRASOUND USING LINEAR OR RADIAL ECHO-ENDOSCOPE - INCLUDING BILIARY AND/OR PANCREATIC EXAM. |
| Z399C                    | OESOPHAGOSCOPY-GASTROSCOPY W/OUT DUDENOSCOPY - ELECTIVE                                                             |
| Z400C                    | OESOPHAGUS - FOR ACTIVE BLEEDING                                                                                    |
| Z512C                    | INTESTINES - ENDOSCOPY ILEOSTOMY OR COLOSTOMY                                                                       |
| Z514C                    | INTESTINES - ENDOSCOPY ILEOSTOMY OR COLOSTOMY WITH BIOPSY                                                           |
| Z515C                    | OESOPHAGOSCOPY WITH/OUT BIOPSY                                                                                      |
| Z527C                    | STOMACH - ENDOSCOP - GASTROSCOPY (W/OUT BIOPSY/PHOTO)                                                               |
| Z528C                    | SUBSEQ (WITHIN 3 MONTHS FOLLOWING PREV GASTROSCOPY                                                                  |
| Z535C                    | RECTUM - SIGMOIDOSCOPY W/OUT ANOSCOPY (NOT WITH Z555/Z580)                                                          |
| Z536C                    | RECTUM - SIGMOIDOSCOPY W/OUT ANOSCOPY - W/BIOPSY                                                                    |
| Z544C                    | ANUS - INC. BIOPSY                                                                                                  |
| Z547C                    | STOMACH - GASTROSCOPY WITH REMOVAL OF FOREIGN BODY                                                                  |
| Z551C                    | LIVER - INC - BIOPSY, NEEDLE                                                                                        |
| Z555C                    | ENDOSCOPY - SIGMOID/DESCENDING COLON                                                                                |
| Z558C                    | BILIARY TRACT - ENDO MANIP &/OR REM DUCT STONES W/OUT SPHINCTEROTOMY                                                |
| Z560C                    | INTESTINES - ENDOSCOPY - DUODENOSCOPY (NOT WITH Z399/Z400)                                                          |
| Z561C                    | INTESTINES - DUODENOSCOPY - CANN. PANCR. DUCT                                                                       |
| Z567C                    | SUBSEQ PROC (WITHIN 3 MON. FOLL PREV ENDOSCOPIC PROC)                                                               |
| Z568C                    | SUBSEQ PROC SAME PHYS (WITHIN 3 MON. PREV ENDOSCOPIC PROC)                                                          |
| Z570C                    | FULG POLYP THROUGH COLONOSCOPE                                                                                      |
| Z571C                    | EXC POLYP, THROUGH COLONSCOPE                                                                                       |
| Z576C                    | INTRO - INJECTIONS ANAL FISSURE                                                                                     |

1  
2  
3  
4  
5  
6  
7  
8  
9  
10  
11  
12  
13  
14  
15  
16  
17  
18  
19  
20  
21  
22  
23  
24  
25  
26  
27  
28  
29  
30  
31  
32  
33  
34  
35  
36  
37  
38  
39  
40  
41  
42  
43  
44  
45  
46  
47  
48  
49  
50  
51  
52  
53  
54  
55  
56  
57  
58  
59  
60

|       |                                                               |
|-------|---------------------------------------------------------------|
| Z580C | ENDOSCOPY (USING 60CM. FLEX SCOPE)                            |
| Z592C | RECTUM - SIGMOIDOSCOPY - DECOMPRESSION/VOLVULUS               |
| Z749C | INTEST - ENDOSCOPY - SUBSEQ PROC (WITHIN 3 MONTHS)            |
| Z753C | RECTUM - POLYPS/TUMOURS ELECTROCOAG - UNDER 2 CMS             |
| Z754C | RECTUM - POLYPS/TUMOURS EXC - UNDER 2 CMS                     |
| Z755C | RECTUM - POLYPS/TUMOURS ELECTROCOAG/EXC - OVER 2 CMS          |
| Z757C | EXC BENIGN ANAL LESION(S)                                     |
| Z761C | RECTUM POLYPS WITH ELECTROCOAGULATION OR EXCISION BASE 5 CM.+ |

\* Alharbi O, Rabeneck L, Sutradhar R, et al. A population-based analysis of outpatient colonoscopy in adults assisted by an anesthesiologist. Anesthesiology 2009;111:734-740.

Confidential

STROBE Statement—Checklist of items that should be included in reports of *cross-sectional studies*

|                           | Item No | Recommendation                                                                                                                                                                                    | Page No.   |
|---------------------------|---------|---------------------------------------------------------------------------------------------------------------------------------------------------------------------------------------------------|------------|
| <b>Title and abstract</b> | 1       | (a) Indicate the study's design with a commonly used term in the title or the abstract                                                                                                            | Title page |
|                           |         | (b) Provide in the abstract an informative and balanced summary of what was done and what was found                                                                                               | 2          |
| <b>Introduction</b>       |         |                                                                                                                                                                                                   |            |
| Background/rationale      | 2       | Explain the scientific background and rationale for the investigation being reported                                                                                                              | 3          |
| Objectives                | 3       | State specific objectives, including any prespecified hypotheses                                                                                                                                  | 3          |
| <b>Methods</b>            |         |                                                                                                                                                                                                   |            |
| Study design              | 4       | Present key elements of study design early in the paper                                                                                                                                           | 4          |
| Setting                   | 5       | Describe the setting, locations, and relevant dates, including periods of recruitment, exposure, follow-up, and data collection                                                                   | 4-5        |
| Participants              | 6       | (a) Give the eligibility criteria, and the sources and methods of selection of participants                                                                                                       | 4-5        |
| Variables                 | 7       | Clearly define all outcomes, exposures, predictors, potential confounders, and effect modifiers. Give diagnostic criteria, if applicable                                                          | Table 1    |
| Data sources/ measurement | 8*      | For each variable of interest, give sources of data and details of methods of assessment (measurement). Describe comparability of assessment methods if there is more than one group              | Table 1    |
| Bias                      | 9       | Describe any efforts to address potential sources of bias                                                                                                                                         | 6          |
| Study size                | 10      | Explain how the study size was arrived at                                                                                                                                                         | 6          |
| Quantitative variables    | 11      | Explain how quantitative variables were handled in the analyses. If applicable, describe which groupings were chosen and why                                                                      | 6          |
| Statistical methods       | 12      | (a) Describe all statistical methods, including those used to control for confounding                                                                                                             | 6          |
|                           |         | (b) Describe any methods used to examine subgroups and interactions                                                                                                                               | n/a        |
|                           |         | (c) Explain how missing data were addressed                                                                                                                                                       | Figure 1   |
|                           |         | (d) If applicable, describe analytical methods taking account of sampling strategy                                                                                                                | 4-5        |
|                           |         | (e) Describe any sensitivity analyses                                                                                                                                                             | n/a        |
| <b>Results</b>            |         |                                                                                                                                                                                                   |            |
| Participants              | 13*     | (a) Report numbers of individuals at each stage of study—eg numbers potentially eligible, examined for eligibility, confirmed eligible, included in the study, completing follow-up, and analysed | Figure 1   |
|                           |         | (b) Give reasons for non-participation at each stage                                                                                                                                              | Figure 1   |
|                           |         | (c) Consider use of a flow diagram                                                                                                                                                                | Figure 1   |
| Descriptive data          | 14*     | (a) Give characteristics of study participants (eg demographic, clinical, social) and information on exposures and potential                                                                      | Table 2    |

|                          |     |                                                                                                                                                                                                              |            |
|--------------------------|-----|--------------------------------------------------------------------------------------------------------------------------------------------------------------------------------------------------------------|------------|
|                          |     | confounders                                                                                                                                                                                                  |            |
|                          |     | (b) Indicate number of participants with missing data for each variable of interest                                                                                                                          | n/a        |
| Outcome data             | 15* | Report numbers of outcome events or summary measures                                                                                                                                                         | Figure 2,3 |
| Main results             | 16  | (a) Give unadjusted estimates and, if applicable, confounder-adjusted estimates and their precision (eg, 95% confidence interval). Make clear which confounders were adjusted for and why they were included | Figure 2,3 |
|                          |     | (b) Report category boundaries when continuous variables were categorized                                                                                                                                    | n/a        |
|                          |     | (c) If relevant, consider translating estimates of relative risk into absolute risk for a meaningful time period                                                                                             | n/a        |
| Other analyses           | 17  | Report other analyses done—eg analyses of subgroups and interactions, and sensitivity analyses                                                                                                               | n/a        |
| <b>Discussion</b>        |     |                                                                                                                                                                                                              |            |
| Key results              | 18  | Summarise key results with reference to study objectives                                                                                                                                                     | 8          |
| Limitations              | 19  | Discuss limitations of the study, taking into account sources of potential bias or imprecision. Discuss both direction and magnitude of any potential bias                                                   | 9          |
| Interpretation           | 20  | Give a cautious overall interpretation of results considering objectives, limitations, multiplicity of analyses, results from similar studies, and other relevant evidence                                   | 9-10       |
| Generalisability         | 21  | Discuss the generalisability (external validity) of the study results                                                                                                                                        | 9          |
| <b>Other information</b> |     |                                                                                                                                                                                                              |            |
| Funding                  | 22  | Give the source of funding and the role of the funders for the present study and, if applicable, for the original study on which the present article is based                                                | 11         |

\*Give information separately for exposed and unexposed groups.

**Note:** An Explanation and Elaboration article discusses each checklist item and gives methodological background and published examples of transparent reporting. The STROBE checklist is best used in conjunction with this article (freely available on the Web sites of PLoS Medicine at <http://www.plosmedicine.org/>, Annals of Internal Medicine at <http://www.annals.org/>, and Epidemiology at <http://www.epidem.com/>). Information on the STROBE Initiative is available at [www.strobe-statement.org](http://www.strobe-statement.org).
